# Supplementary material for: Clonal evolution in myelodysplastic syndromes
Source: PubMed Central journal article supplement (PMC5530598; doi:10.1038/ncomms15099), 2017-04-21
Supplement: ncomms15099-s1.pdf [file ncomms15099-s1.pdf]

**Supplementary Table 1. Trusight myeloid gene panel**

| 54 driver genes |          |       |        |       |
|-----------------|----------|-------|--------|-------|
| ABL1            | CEBPA    | HRAS  | MYD88  | SF3B1 |
| ASXL1           | CSF3R    | IDH1  | NOTCH1 | SMC1A |
| ATRX            | CUX1     | IDH2  | NPM1   | SMC3  |
| BCOR            | DNMT3A   | IKZF1 | NRAS   | SRSF2 |
| BCORL1          | ETV6/TEL | JAK2  | PDGFRA | STAG2 |
| BRAF            | EZH2     | JAK3  | PHF6   | TET2  |
| CALR            | FBXW7    | KDM6A | PTEN   | TP53  |
| CBL             | FLT3     | KIT   | PTPN11 | U2AF1 |
| CBLB            | GATA1    | KRAS  | RAD21  | WT1   |
| CBLC            | GATA2    | MLL   | RUNX1  | ZRSR2 |
| CDKN2A          | GNAS     | MPL   | SETBP1 |       |

**Supplementary Table 2. Gene panel targeted-capture sequencing**

| 72 driver genes |         |        |        |       |
|-----------------|---------|--------|--------|-------|
| ASXL1           | CUX1    | IDH2   | PHF6   | SMC1A |
| ASXL2           | DCLRE1C | IRF1   | PIGA   | SMC3  |
| ATM             | DDX41   | JAK2   | PIGT   | SRSF2 |
| ATRX            | DNMT3A  | KDM6A  | PPM1D  | STAG1 |
| BCOR            | EP300   | KIT    | PRPF8  | STAG2 |
| BCORL1          | ETNK1   | KRAS   | PTPN11 | STAT3 |
| BRCC3           | ETV6    | LUC7L2 | RAD21  | TET2  |
| CALR            | EZH2    | MLL2   | RIT1   | TP53  |
| CBL             | FANCA   | MPL    | RUNX1  | U2AF1 |
| CDKN2A          | FANCM   | MRE11A | SETBP1 | U2AF2 |
| CEBPA           | FLT3    | NF1    | SETD2  | WT1   |
| CHEK2           | GATA2   | NFE2   | SF1    | ZRSR2 |
| CREBBP          | GNAS    | NPM1   | SF3A1  |       |
| CSF3R           | GNB1    | NRAS   | SF3B1  |       |
| CTCF            | IDH1    | PDS5B  | SH2B3  |       |

**Supplementary Table 3. Results SNP array**

| Patient | Months from BL  | Aberration (% of cells)               | Aberration according to ISCN (hg19 reference)                                     |
|---------|-----------------|---------------------------------------|-----------------------------------------------------------------------------------|
| UPN01   | 2               | del(5q) (70%)                         | 5q15q33.2(95.804.838-154.408.872)x1~2                                             |
|         | 119             | del(5q) (90%)                         | 5q15q33.2(95.804.838-154.408.872)x1~2                                             |
| UPN02   | BL              | CN-LOH4q (75%)                        | 4q21.23qter(85.662.390-190.921.709)x2 hmz                                         |
|         | 60              | CN-LOH4q (90%)                        | 4q21.23qter(85.662.390-190.921.709)x2 hmz                                         |
| UPN03   | BL              | no abn                                | (1-22)x2,(XY)x1                                                                   |
|         | 93              | no abn                                | (1-22)x2,(XY)x1                                                                   |
| UPN04   | BL              | no abn                                | (1-22)x2,(XY)x1                                                                   |
|         | 72              | no abn                                | (1-22)x2,(XY)x1                                                                   |
| UPN05   | BL              | trisomy 8 (20%)                       | (8)x2~3                                                                           |
|         |                 | loss <i>ETV6</i> (90%)                | 12p13.2(11867287-12027012)x1                                                      |
|         | 23              | loss <i>ETV6</i> (40%)                | 12p13.2(11867287-12027012)x1                                                      |
|         | 48              | no abn                                | (1-22)x2,(XY)x1                                                                   |
|         | 79              | loss <i>ETV6</i> (90%)                | 12p13.2(11867287-12027012)x1                                                      |
|         | 84              | loss <i>ETV6</i> (90%)                | 12p13.2(11867287-12027012)x1                                                      |
|         |                 | gain <i>KMT2A</i> (60%)               | 11q23.3(118338477-118354345)x3                                                    |
| UPN06   | BL              | trisomy 21 (50%)                      | (21)x2~3                                                                          |
|         | 20              | trisomy 21 (40%)                      | (21)x2~3                                                                          |
|         | 57              | trisomy 8 (60%)                       | (8)x3                                                                             |
|         |                 | CN-LOH14q (100%)                      | 14q11.2qter(23431738-107285437)x2 hmz                                             |
|         |                 | trisomy 21 (75%)                      | (21)x3                                                                            |
|         | 63              | trisomy 8 (90%)                       | (8)x3                                                                             |
|         |                 | CN-LOH14q (95%)                       | 14q11.2qter(23431738-107285437)x2 hmz                                             |
|         |                 | trisomy 21 (95%)                      | (21)x3                                                                            |
|         | 64              | trisomy 8 (100%)                      | (8)x3                                                                             |
|         | CN-LOH14q (95%) | 14q11.2qter(23431738-107285437)x2 hmz |                                                                                   |
|         |                 | trisomy 21(100%)                      | (21)x3                                                                            |
| UPN07   | BL              | no abn                                | (1-22)x2,(XY)x1                                                                   |
|         | 23              | no abn                                | (1-22)x2,(XY)x1                                                                   |
|         | 38              | trisomy 8 (40%)                       | (8)x2~3                                                                           |
|         | 44              | complex including trisomy 8 (20-30%)  | (3,5,7,9,10,12,16,17,22)x1~2                                                      |
|         |                 |                                       | 4q13.3q24(72018147-102866413)x2~3<br>4q24qter(102866413-191000000)x1~2<br>(8)x2~3 |
| UPN08   | BL              | del(5q) (90%)                         | 5q21.3q34(82169433-161991376)x1                                                   |
|         | 112             | no abn                                | (1-22,X)x2                                                                        |
| UPN09   | BL              | del(5q) (60%)                         | 5q14.3q34(86890558-162823229)x1~2                                                 |
|         | 53              | no abn                                | (1-22,X)x2                                                                        |
| UPN10   | 3               | del(5q) (10%)                         | 5q15q33.3(98131505-156829473)x1~2                                                 |
|         |                 | del(13q) (10%)                        | 13q13.1q14.3(32377128-53622642)x1~2                                               |
|         | 49              | no abn                                | (1-22,X)x2                                                                        |
| UPN11   | BL              | gain <i>ERG</i> 21q (90%)             | 21q22.13(39593444-39950442)x3                                                     |
|         | 29              | gain <i>ERG</i> 21q (100%)            | 21q22.13(39593444-39950442)x3                                                     |

UPN indicates unique patient number; hmz, homozygous; CN-LOH, copy-neutral loss of heterozygosity; no abn, no abnormalities; BL, baseline

**Supplementary Table 4: Detected variants in T-cells**

| Patient      | no. | Gene     | Type of variant      | Chromosome | Start co-ordinate of variant (GRCh37/hg19) | End co-ordinate of variant (GRCh37/hg19) | Reference sequence | Observed sequence | Transcript ID | Coding sequence change | Amino acid change | VAF (%) |
|--------------|-----|----------|----------------------|------------|--------------------------------------------|------------------------------------------|--------------------|-------------------|---------------|------------------------|-------------------|---------|
| <b>UPN03</b> | 1   | ZNF493   | nonsynonymous SNV    | chr19      | 21607599                                   | 21607599                                 | G                  | A                 | NM_175910     | c.G1754A               | p.C585Y           | 7.4     |
|              | 2   | ZNF493   | nonsynonymous SNV    | chr19      | 21606245                                   | 21606245                                 | C                  | G                 | NM_175910     | c.C400G                | p.Q134E           | 10.8    |
|              | 3   | ZNF716   | nonsynonymous SNV    | chr7       | 57529057                                   | 57529057                                 | C                  | A                 | NM_001159279  | c.C890A                | p.T297K           | 8.7     |
|              | 4   | ZNF721   | nonsynonymous SNV    | chr4       | 435743                                     | 435743                                   | G                  | T                 | NM_133474     | c.C2513A               | p.T838K           | 7.3     |
|              | 5   | ZNF732   | nonsynonymous SNV    | chr4       | 266059                                     | 266059                                   | G                  | T                 | NM_001137608  | c.C584A                | p.T195K           | 10.0    |
| <b>UPN04</b> | -   | -        | -                    | -          | -                                          | -                                        | -                  | -                 | -             | -                      | -                 | -       |
| <b>UPN05</b> | -   | -        | -                    | -          | -                                          | -                                        | -                  | -                 | -             | -                      | -                 | -       |
| <b>UPN07</b> | 1   | ABCF1    | nonsynonymous SNV    | chr6       | 30539290                                   | 30539290                                 | C                  | T                 | NM_001025091  | c.C26T                 | p.P9L             | 17.0    |
|              | 2   | ERC2     | nonsynonymous SNV    | chr3       | 55733486                                   | 55733486                                 | A                  | G                 | NM_015576     | c.T2761C               | p.Y921H           | 10.2    |
|              | 3   | MYLK     | nonsynonymous SNV    | chr3       | 123419020                                  | 123419020                                | C                  | T                 | NM_053026     | c.G3088A               | p.A1030T          | 7.5     |
|              | 4   | OR10G7   | nonsynonymous SNV    | chr11      | 123909011                                  | 123909011                                | C                  | T                 | NM_001004463  | c.G698A                | p.R233K           | 7.1     |
|              | 5   | OR10G8   | nonsynonymous SNV    | chr11      | 123900495                                  | 123900495                                | A                  | C                 | NM_001004464  | c.A166C                | p.T56P            | 11.4    |
|              | 6   | SERPINA3 | nonsynonymous SNV    | chr14      | 95085756                                   | 95085756                                 | A                  | C                 | NM_001085     | c.A868C                | p.M290L           | 10.0    |
|              | 7   | SERPINA3 | nonsynonymous SNV    | chr14      | 95085757                                   | 95085757                                 | T                  | A                 | NM_001085     | c.T869A                | p.M290K           | 9.4     |
|              | 8   | TMEM67   | frameshift insertion | chr8       | 94772148                                   | 94772148                                 | -                  | T                 | NM_001142301  | c.91dupT               | p.G30fs           | 7.1     |
|              | 9   | ZNF107   | nonsynonymous SNV    | chr7       | 64167829                                   | 64167829                                 | T                  | C                 | NM_001282360  | c.T1258C               | p.S420P           | 7.6     |
|              | 10  | ZNF138   | nonsynonymous SNV    | chr7       | 64292467                                   | 64292467                                 | C                  | G                 | NM_001271649  | c.C406G                | p.Q136E           | 8.3     |
|              | 11  | ZNF208   | nonsynonymous SNV    | chr19      | 22154859                                   | 22154859                                 | C                  | T                 | NM_007153     | c.G2977A               | p.V993I           | 7.3     |
|              | 12  | ZNF267   | nonsynonymous SNV    | chr16      | 31927543                                   | 31927543                                 | G                  | A                 | NM_003414     | c.G1973A               | p.R658K           | 9.8     |
|              | 13  | ZNF431   | nonsynonymous SNV    | chr19      | 21365885                                   | 21365885                                 | T                  | A                 | NM_133473     | c.T779A                | p.F260Y           | 7.0     |
|              | 14  | ZNF678   | nonsynonymous SNV    | chr1       | 227842419                                  | 227842419                                | C                  | A                 | NM_178549     | c.C633A                | p.D211E           | 8.0     |
|              | 15  | ZNF695   | nonsynonymous SNV    | chr1       | 247151018                                  | 247151018                                | T                  | G                 | NM_020394     | c.A799C                | p.T267P           | 11.2    |
|              | 16  | ZNF714   | nonsynonymous SNV    | chr19      | 21300069                                   | 21300069                                 | T                  | A                 | NM_182515     | c.T599A                | p.F200Y           | 7.6     |
|              | 17  | ZNF721   | nonsynonymous SNV    | chr4       | 436658                                     | 436658                                   | A                  | T                 | NM_133474     | c.T1598A               | p.V533E           | 7.3     |
|              | 18  | ZNF721   | nonsynonymous SNV    | chr4       | 435773                                     | 435773                                   | C                  | T                 | NM_133474     | c.G2483A               | p.R828K           | 7.0     |
|              | 19  | ZNF721   | nonsynonymous SNV    | chr4       | 436583                                     | 436583                                   | G                  | T                 | NM_133474     | c.C1673A               | p.T558K           | 7.1     |
|              | 20  | ZNF721   | nonsynonymous SNV    | chr4       | 437330                                     | 437330                                   | A                  | T                 | NM_133474     | c.T926A                | p.V309E           | 7.1     |
|              | 21  | ZNF732   | nonsynonymous SNV    | chr4       | 266078                                     | 266078                                   | C                  | T                 | NM_001137608  | c.G565A                | p.A189T           | 9.7     |
|              | 22  | ZNF732   | nonsynonymous SNV    | chr4       | 266059                                     | 266059                                   | G                  | T                 | NM_001137608  | c.C584A                | p.T195K           | 9.8     |
|              | 23  | ZNF91    | nonsynonymous SNV    | chr19      | 23542561                                   | 23542561                                 | T                  | C                 | NM_001300951  | c.A3124G               | p.R1042G          | 7.3     |
|              | 24  | ZNF99    | nonsynonymous SNV    | chr19      | 22940859                                   | 22940859                                 | T                  | C                 | NM_001080409  | c.A1852G               | p.K618E           | 11.2    |
| <b>UPN08</b> | 1   | ZNF716   | nonsynonymous SNV    | chr7       | 57529057                                   | 57529057                                 | C                  | A                 | NM_001159279  | c.C890A                | p.T297K           | 7.6     |

UPN indicates unique patient number; Chr., chromosome; SNV, single nucleotide variant.

**Supplementary Table 5. Primer strategy**

| PCR    | Direction | Primer build up                | Sequence primer (5'--> 3')                              |
|--------|-----------|--------------------------------|---------------------------------------------------------|
| PCR1   | Forward   | CS1 - target specific sequence | ACACTGACGACATGGTTCTACAxxx                               |
|        | Reverse   | CS2 - target specific sequence | TACGGTAGCAGAGACTTGGTCTxxx                               |
| PCR2_A | Forward   | A adapter - barcode - CS1      | CCATCTCATCCCTGCGTGTCTCCGACTCAGyyyACACTGACGACATGGTTCTACA |
|        | Reverse   | trP1 adapter - CS2             | CCTCTCTATGGGCAGTCGGTGATTACGGTAGCAGAGACTTGGTCT           |
| PCR2_B | Forward   | trP1 adapter - CS1             | CCTCTCTATGGGCAGTCGGTGATACACTGACGACATGGTTCTACA           |
|        | Reverse   | A adapter - barcode - CS2      | CCATCTCATCCCTGCGTGTCTCCGACTCAGyyyTACGGTAGCAGAGACTTGGTCT |

CS: common sequence

xxx: Target specific primer, see Supplementary data 4

yyy: Barcode primer, see Supplementary Table 6

**Supplementary Table 6. Barcode primer sequences**

| Barcode no.   | Barcode Sequence | Barcode no.   | Barcode Sequence |
|---------------|------------------|---------------|------------------|
| Ion Xpress_1  | CTAAGGTAAC       | Ion Xpress_26 | TTACAACCTC       |
| Ion Xpress_2  | TAAGGAGAAC       | Ion Xpress_27 | AACCATCCGC       |
| Ion Xpress_3  | AAGAGGATTC       | Ion Xpress_28 | ATCCGGAATC       |
| Ion Xpress_4  | TACCAAGATC       | Ion Xpress_29 | TCGACCACTC       |
| Ion Xpress_5  | CAGAAGGAAC       | Ion Xpress_30 | CGAGGTTATC       |
| Ion Xpress_6  | CTGCAAGTTC       | Ion Xpress_31 | TCCAAGCTGC       |
| Ion Xpress_7  | TTCGTGATTC       | Ion Xpress_32 | TCTTACACAC       |
| Ion Xpress_8  | TTCCGATAAC       | Ion Xpress_33 | TTCTCATTGAAC     |
| Ion Xpress_9  | TGAGCGGAAC       | Ion Xpress_34 | TCGCATCGTTC      |
| Ion Xpress_10 | CTGACCGAAC       | Ion Xpress_35 | TAAGCCATTGTC     |
| Ion Xpress_11 | TCCTCGAATC       | Ion Xpress_36 | AAGGAATCGTC      |
| Ion Xpress_12 | TAGGTGGTTC       | Ion Xpress_37 | CTTGAGAATGTC     |
| Ion Xpress_13 | TCTAACGGAC       | Ion Xpress_38 | TGGAGGACGGAC     |
| Ion Xpress_14 | TTGGAGTGTC       | Ion Xpress_39 | TAACAATCGGC      |
| Ion Xpress_15 | TCTAGAGGTC       | Ion Xpress_40 | CTGACATAATC      |
| Ion Xpress_16 | TCTGGATGAC       | Ion Xpress_41 | TTCCACTTCGC      |
| Ion Xpress_17 | TCTATTCGTC       | Ion Xpress_42 | AGCACGAATC       |
| Ion Xpress_18 | AGGCAATTGC       | Ion Xpress_43 | CTTGACACCGC      |
| Ion Xpress_19 | TTAGTCGGAC       | Ion Xpress_44 | TTGGAGGCCAGC     |
| Ion Xpress_20 | CAGATCCATC       | Ion Xpress_45 | TGGAGCTTCCTC     |
| Ion Xpress_21 | TCGCAATTAC       | Ion Xpress_46 | TCAGTCCGAAC      |
| Ion Xpress_22 | TTCGAGACGC       | Ion Xpress_47 | TAAGGCAACCAC     |
| Ion Xpress_23 | TGCCACGAAC       | Ion Xpress_48 | TTCTAAGAGAC      |
| Ion Xpress_24 | AACCTCATTC       | Ion Xpress_49 | TCCTAACATAAC     |
| Ion Xpress_25 | CCTGAGATAC       | Ion Xpress_50 | CGGACAATGGC      |

No. indicates number

**Supplementary Table 7. PCR1 protocols**

| PCR1 program 1 |                            |          |                                               |
|----------------|----------------------------|----------|-----------------------------------------------|
| Step           | Temperature                | Time     | Cycles                                        |
| 1              | 98°C                       | 30 sec   | 1                                             |
| 2              | 98°C                       | 10 sec   | 10 cycles<br>touchdown + 20<br>cycles at 58°C |
|                | 63°C → 58°C (delta -0.5°C) | 15 sec   |                                               |
|                | 72°C                       | 10 sec   |                                               |
| 3              | 72°C                       | 2.00 min | 1                                             |
|                | 4°C                        | hold     |                                               |
| PCR1 program 2 |                            |          |                                               |
| Step           | Temperature                | Time     | Cycles                                        |
| 1              | 98°C                       | 30 sec   | 1                                             |
| 2              | 98°C                       | 10 sec   | 15 cycles<br>touchdown + 15<br>cycles at 58°C |
|                | 73°C → 58°C (delta -1°C)   | 15 sec   |                                               |
|                | 72°C                       | 10 sec   |                                               |
| 3              | 72°C                       | 2.00 min | 1                                             |
|                | 4°C                        | hold     |                                               |
| PCR1 program 3 |                            |          |                                               |
| Step           | Temperature                | Time     | Cycles                                        |
| 1              | 98°C                       | 30 sec   | 1                                             |
| 2              | 98°C                       | 10 sec   | 10 cycles<br>touchdown + 20<br>cycles op 63°C |
|                | 73°C → 63°C (delta -1°C)   | 15 sec   |                                               |
|                | 72°C                       | 10 sec   |                                               |
| 3              | 72°C                       | 2.00 min | 1                                             |
|                | 4°C                        | hold     |                                               |

**Supplementary Table 8. PCR2 protocol**

| PCR2 program |             |          |           |
|--------------|-------------|----------|-----------|
| Step         | Temperature | Time     | Cycles    |
| 1            | 98°C        | 30 sec   | 1         |
| 2            | 98°C        | 10 sec   | 10 cycles |
|              | 60°C        | 15 sec   |           |
|              | 72°C        | 10 sec   |           |
| 3            | 72°C        | 2.00 min | 1         |
|              | 4°C         | hold     |           |

**Supplementary Table 9. Analysis of 8 mutations in 10 healthy donors**

| Mutation               | Donor 1 | Donor 2 | Donor 3 | Donor 4 | Donor 5 | Donor 6 | Donor 7 | Donor 8 | Donor 9 | Donor 10 |
|------------------------|---------|---------|---------|---------|---------|---------|---------|---------|---------|----------|
| CEP89 p.P48R (VAF %)   | 0.04    | 0.08    | 0.07    | 0.02    | 0.10    | 0.08    | 0.11    | 0.18    | 0.11    | 0.06     |
| DOCK5 p.M800R (VAF %)  | 0.00    | 0.00    | 0.01    | 0.00    | 0.00    | 0.00    | 0.00    | 0.00    | 0.00    | 0.00     |
| OR14I1 p.R120L (VAF %) | 0.01    | 0.00    | 0.00    | 0.00    | 0.00    | 0.01    | 0.02    | 0.01    | 0.00    | 0.00     |
| PALLD p.P51S (VAF %)   | 0.01    | 0.02    | 0.02    | 0.02    | 0.00    | 0.00    | 0.02    | 0.02    | 0.01    | 0.02     |
| RAD50 p.D69Y (VAF %)   | 0.00    | 0.00    | 0.01    | 0.00    | 0.00    | 0.00    | 0.00    | 0.00    | 0.00    | 0.01     |
| RASA1 p.A170P (VAF %)  | 0.01    | 0.01    | 0.01    | 0.01    | 0.01    | 0.01    | 0.02    | 0.01    | 0.01    | 0.01     |
| RELN p.R3397W (VAF %)  | 0.02    | 0.01    | 0.04    | 0.02    | 0.03    | 0.01    | 0.03    | 0.01    | 0.02    | 0.02     |
| TP53 p.R141L (VAF %)   | 0.01    | 0.00    | 0.01    | 0.00    | 0.00    | 0.00    | 0.00    | 0.01    | 0.00    | 0.00     |

100% specificity with a cut-off of 0.20%

**Supplementary Table 10. Dilution series of three different SNPs**

| SNPs                               | Percentage DNA with SNP |      |      |      |      |      |      |      |     |      |    |    |     |
|------------------------------------|-------------------------|------|------|------|------|------|------|------|-----|------|----|----|-----|
|                                    | 0                       | 0.05 | 0.1  | 0.2  | 0.4  | 0.8  | 1.6  | 3.1  | 6.3 | 12.5 | 25 | 50 | 100 |
| CLDN18 p.M1V heterozygous (VAF %)  | 0.01                    | 0.05 | 0.05 | 0.1  | 0.14 | 0.3  | 0.6  | 1    | 2   | 5    | 10 | 22 | 49  |
| TET2 p.N1774S heterozygous (VAF %) | -                       | 0.02 | 0.05 | 0.07 | 0.14 | 0.17 | 0.51 | 0.99 | 2   | 4    | 9  | 18 | 41  |
| TET2 p.I1762V homozygous (VAF %)   | 0                       | 0.04 | 0.07 | 0.19 | 0.29 | 0.44 | 1.04 | 2    | 4   | 9    | 19 | 41 | 100 |

- indicates SNP does not exceed noise: the SNP is not the second highest base at this position

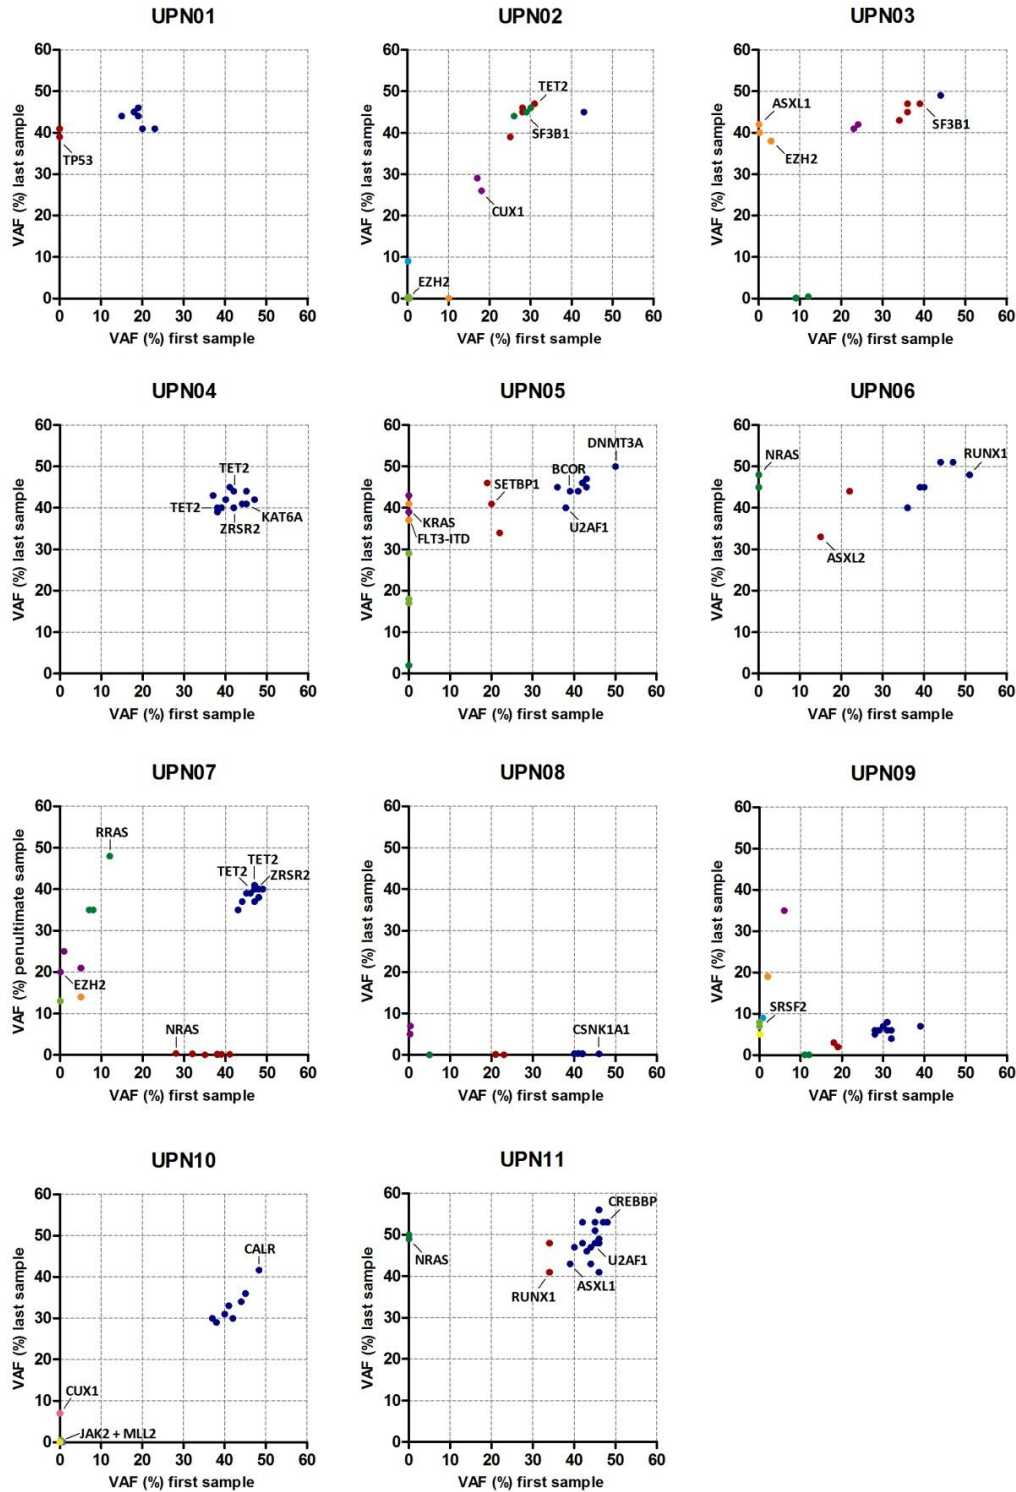

**Supplementary Figure 1. Comparison of variant allele frequencies (VAFs) measured in the first and last bone marrow sample of each patient.** Variants located on the X- or Y-axis indicate mutations only present in the first or last sample. Many clones can already be distinguished by comparing these two samples. However, clonal composition cannot be fully resolved, as some mutations belonging to different (sub)clones cluster together (UPN02, UPN05, UPN09), and some mutations will be missed (UPN02, UPN10) when only the first and last sample are investigated, without intermediate time points. VAFs of mutations in regions harboring a copy number variation are corrected for local ploidy. For UPN07, the penultimate sample was used, since the last sample had a very complex karyotype. Mutations within the same clone were colored identical.

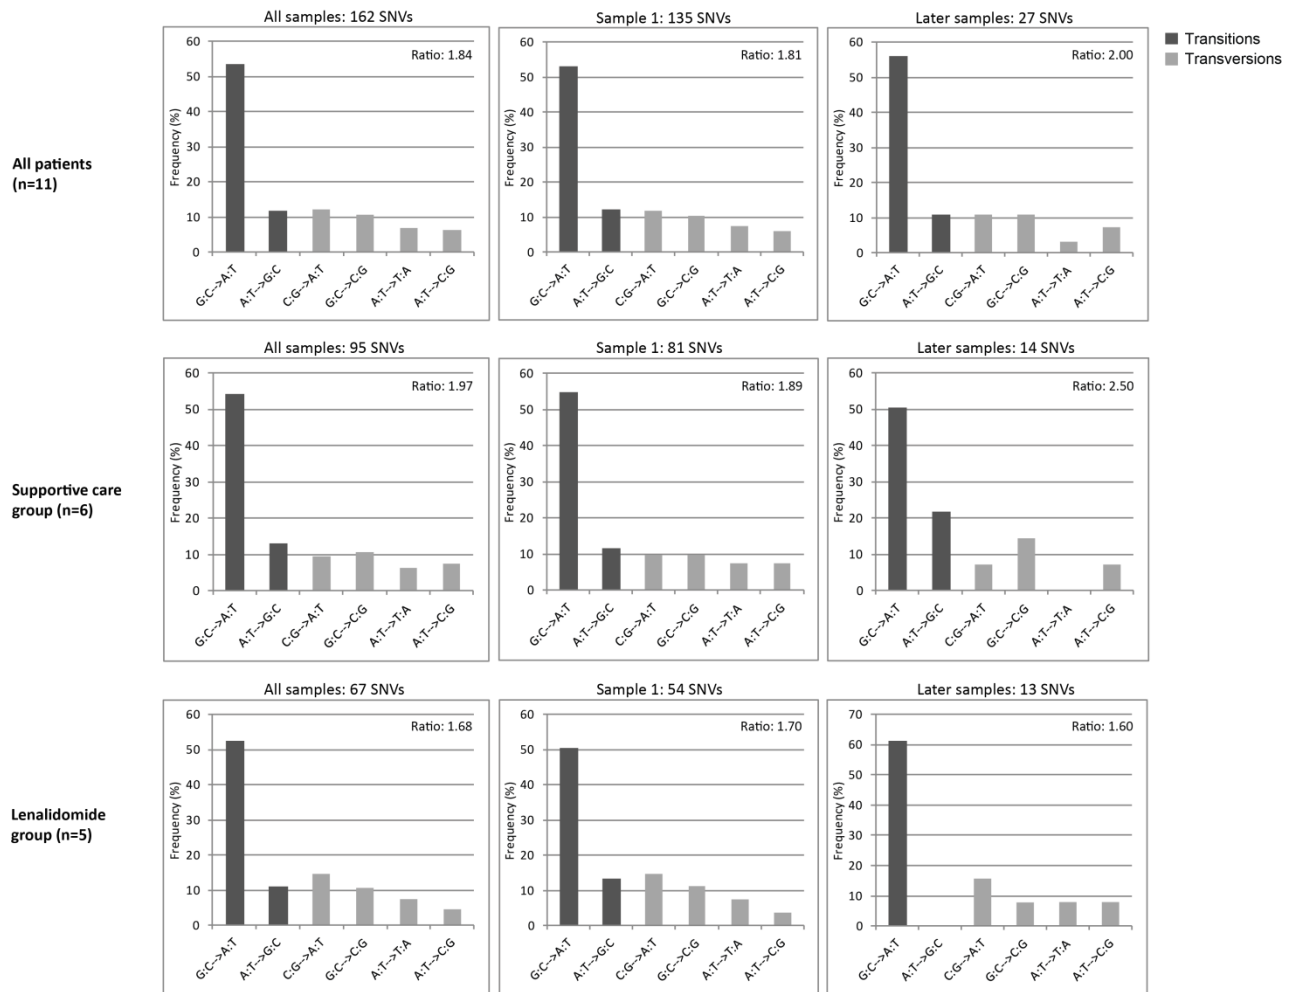

**Supplementary Figure 2. Comparison of the type of mutations in early vs. later time points.** No major differences were observed when comparing the type of mutations present in the first sample (variant allele frequency > 0.2%) compared to mutations that arise at later time points. Also, when comparing the two treatment groups no major differences were observed. The transition/transversion ratio is indicated in each graph.



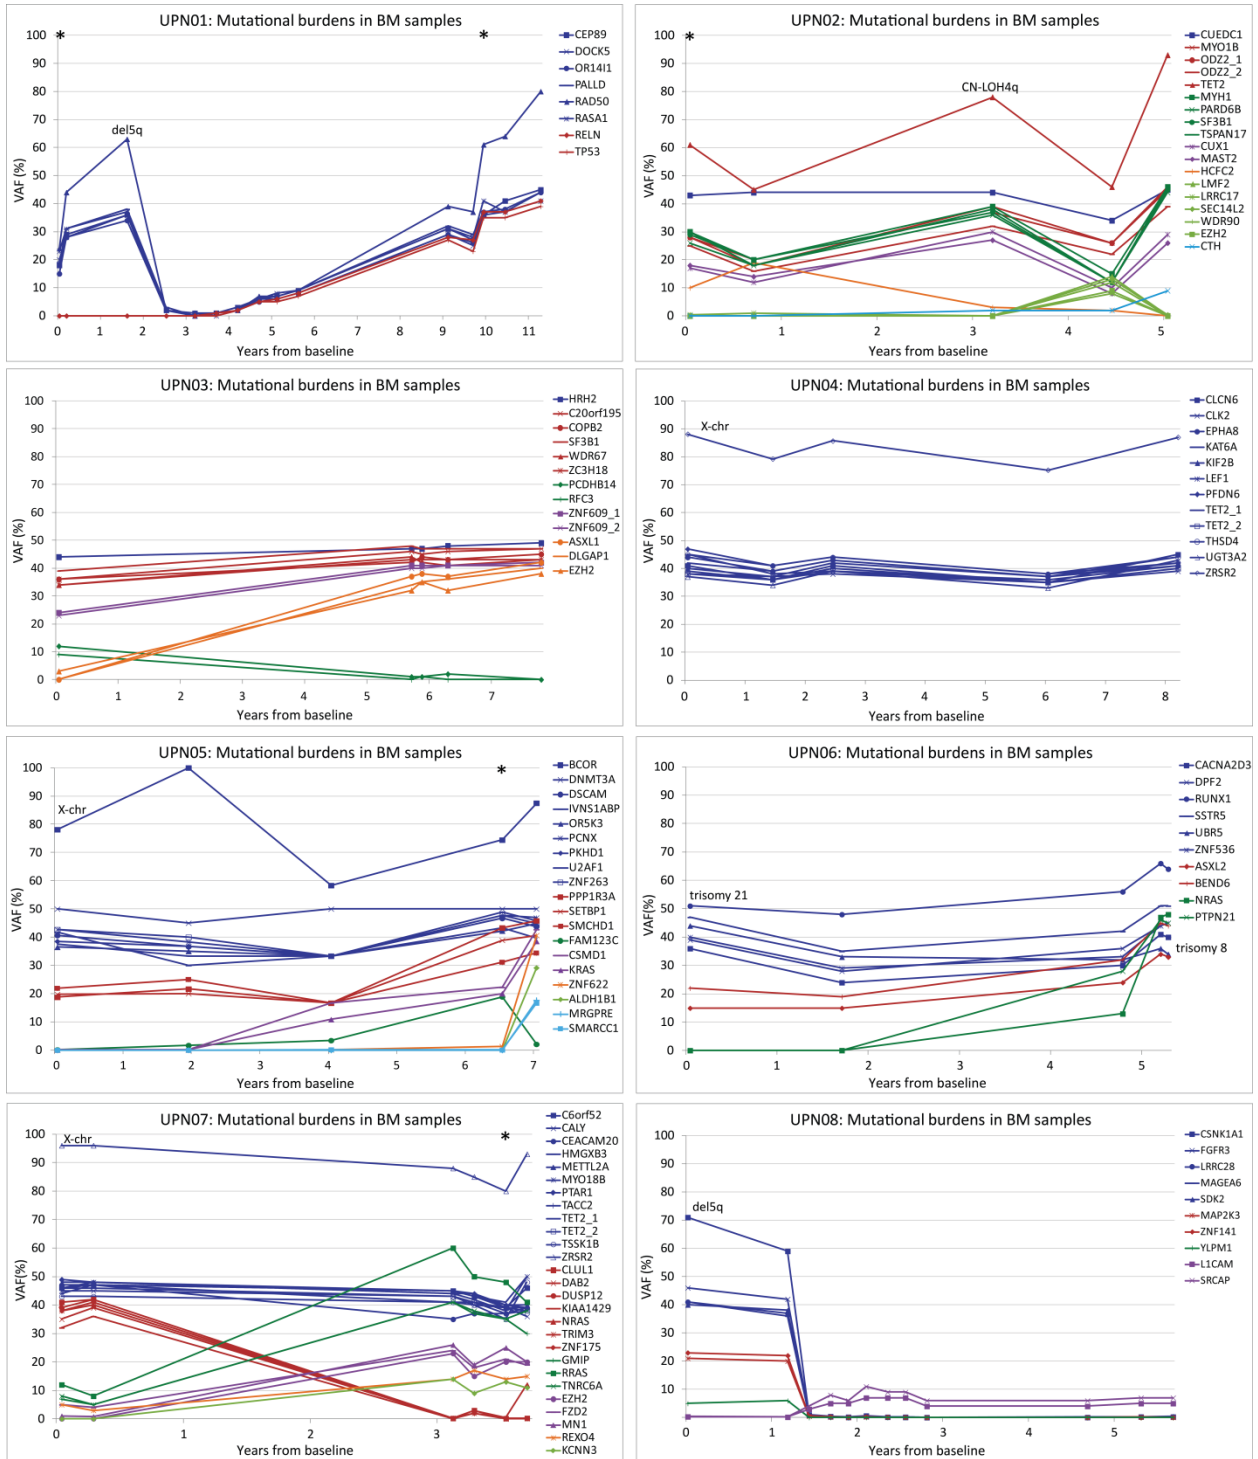

**Supplementary Figure 3. Mutational burdens in bone marrow (BM) samples.** Graphs showing the variant allele frequencies (VAFs) measured using amplicon-based targeted deep sequencing (not corrected for local ploidy). For patient UPN01-UPN08, the patterns of all mutations are plotted in time and mutations are color-coded to match the (sub)clones as depicted in figures 2 and 3. Indicated is also whether a variant locates to a region affected by a copy number alteration or is located to the X-chromosome in case of a male patient. \*indicates amplified DNA sample used for targeted deep sequencing

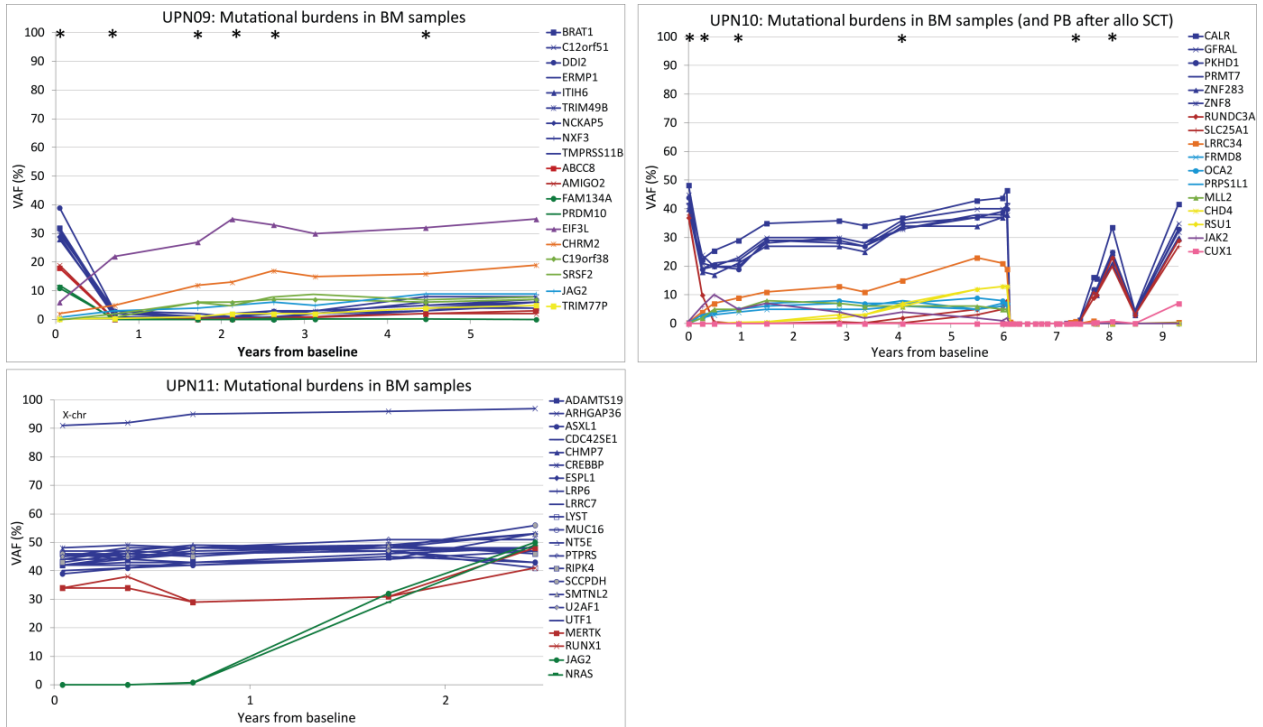

**Supplementary Figure 4. Mutational burdens in bone marrow (BM) samples.** Graphs showing the variant allele frequencies (VAFs) measured using amplicon-based targeted deep sequencing (not corrected for local ploidy). For patient UPN09, 10 and 11, the patterns of all mutations are plotted in time and mutations are color-coded to match the (sub)clones as depicted in figures 2 and 3. Indicated is also whether a variant locates to the X-chromosome in case of a male patient. \*indicates amplified DNA sample used for targeted deep sequencing

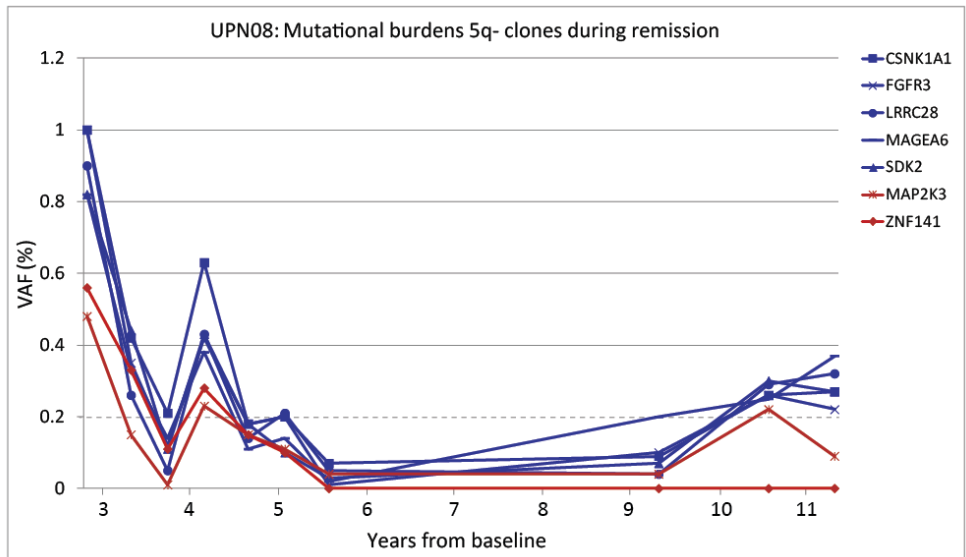

**Supplementary Figure 5. Mutations still detectable in remission time points of patient UPN08.** Mutations can still be detected at low variant allele frequency (VAF:~0.2%) under lenalidomide treatment, which indicates the presence of remaining MDS cells (~0.4%).

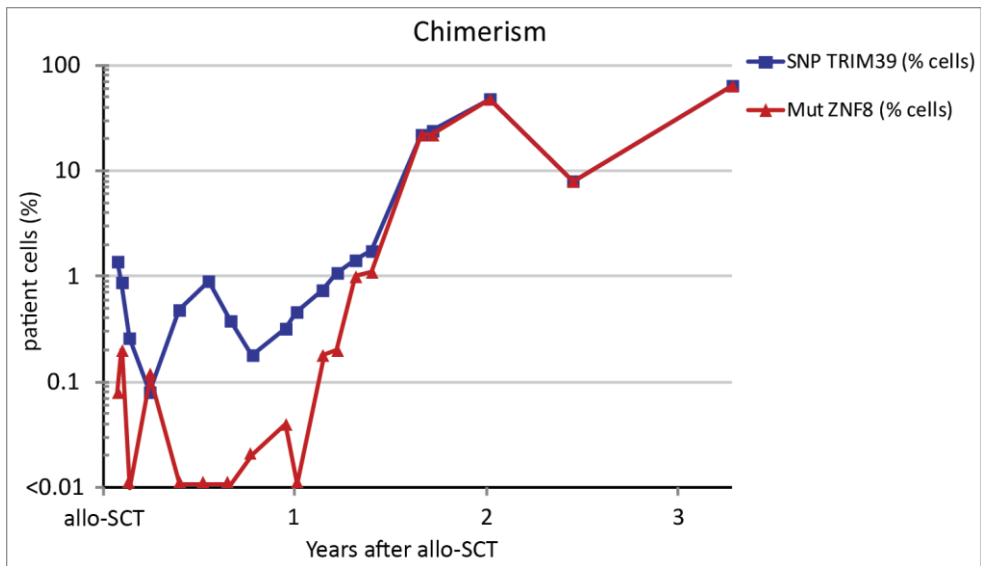

**Supplementary Figure 6. Chimerism analysis in peripheral blood samples of UPN10 after allogeneic stem cell transplantation (allo-SCT).** The percentage of blood cells with a patient-specific single nucleotide polymorphism (SNP TRIM39) is depicted, as well as the percentage of blood cells with a patient-specific mutation (mut ZNF8). Patient cells could still be detected after allo-SCT (<math><1\%</math>). Approximately one year after SCT, the mutated cells started to increase in frequency, causing a relapse of MDS.

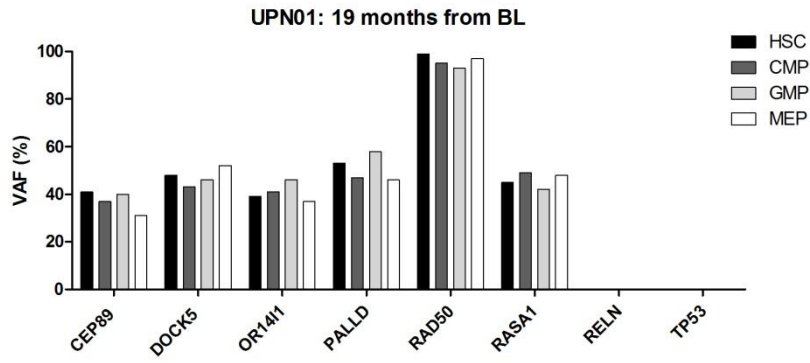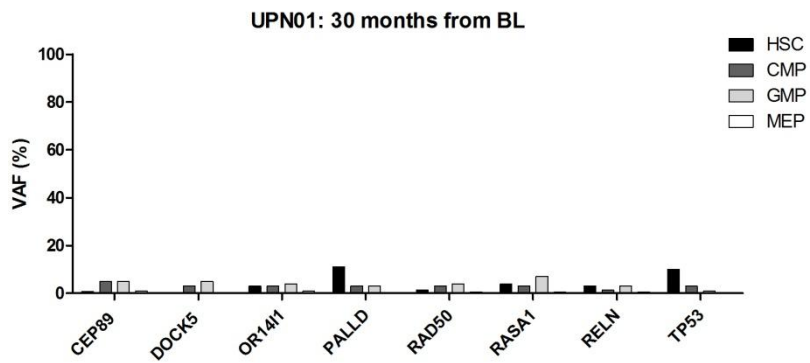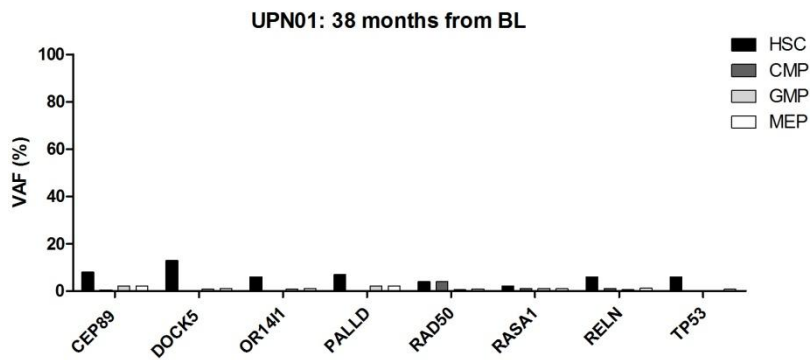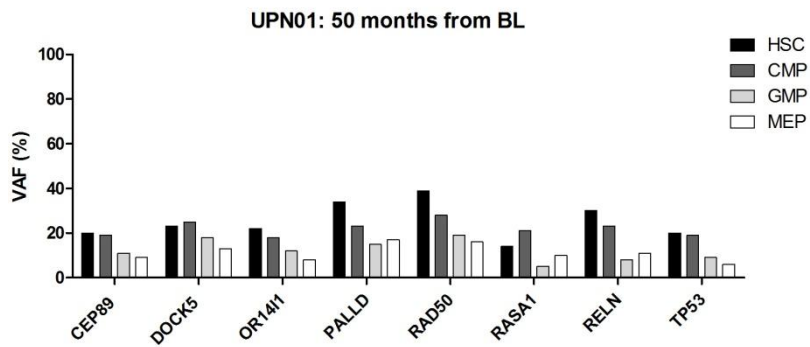

**Supplementary Figure 7. Comparison of variant allele frequencies (VAFs) in myeloid progenitor fractions of UPN01.** Hematopoietic stem cells (HSCs), common myeloid progenitors (CMPs), granulocyte-macrophage progenitors (GMPs) and megakaryocyte-erythroid progenitors (MEPs) were sorted from bone marrow samples. The VAFs in all different progenitor fractions are compared. VAFs are not corrected for local ploidy. BL indicates baseline.

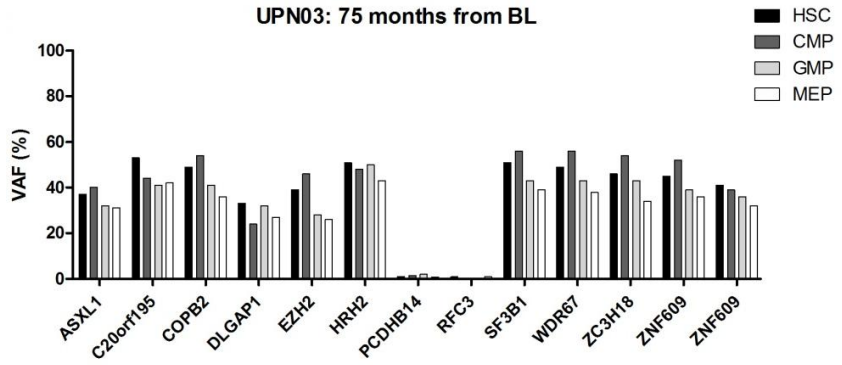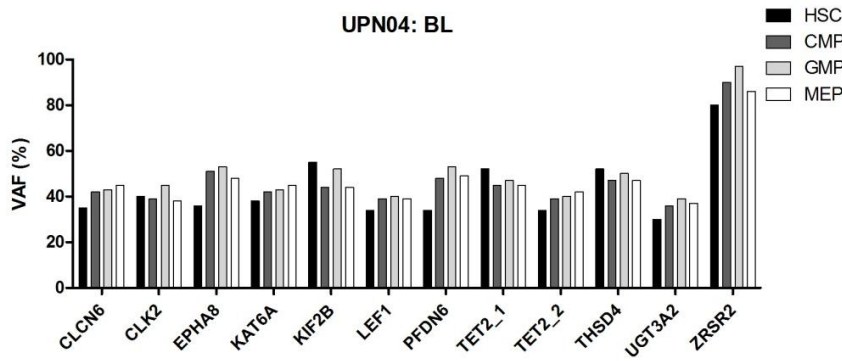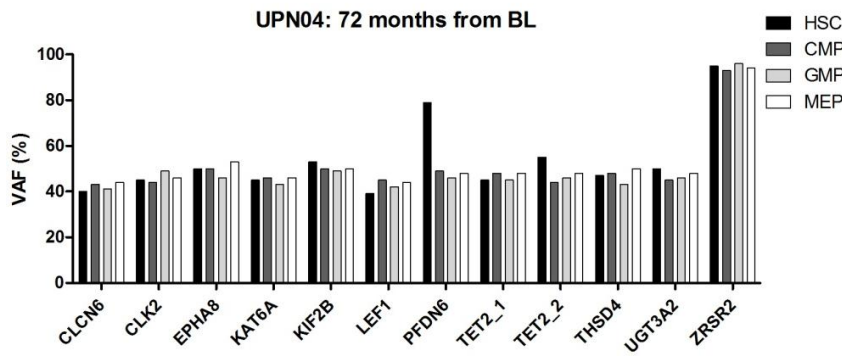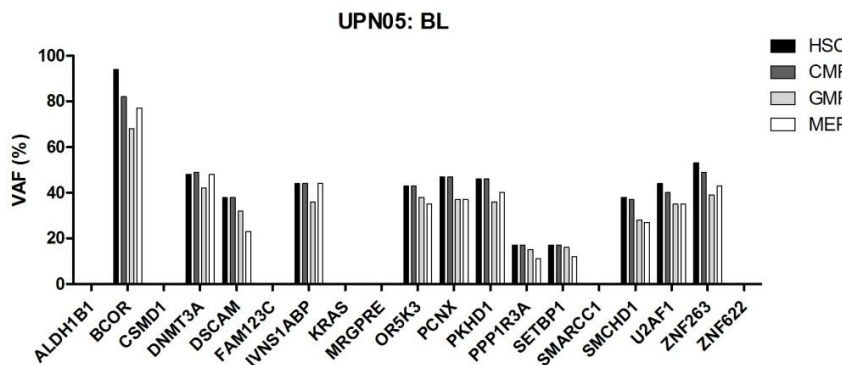

**Supplementary Figure 8. Comparison of variant allele frequencies (VAFs) in myeloid progenitor fractions of UPN03, 04 and 05.** Hematopoietic stem cells (HSCs), common myeloid progenitors (CMPs), granulocyte-macrophage progenitors (GMPs) and megakaryocyte-erythroid progenitors (MEPs) were sorted from bone marrow samples. The VAFs in all different progenitor fractions are compared. VAFs are not corrected for local ploidy. BL indicates baseline

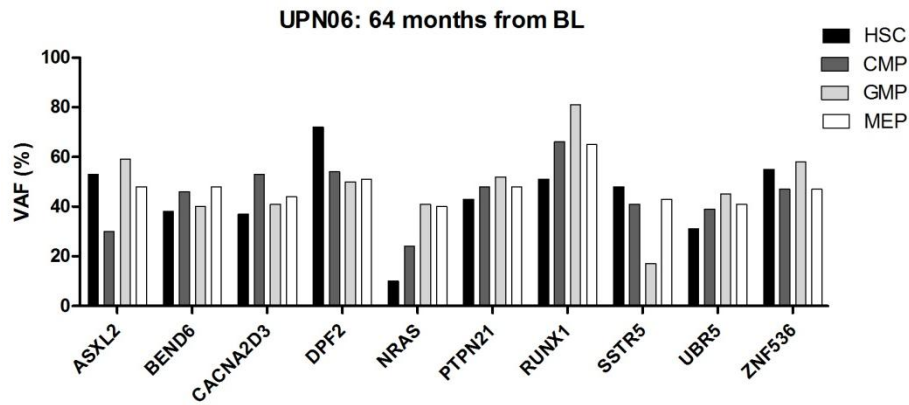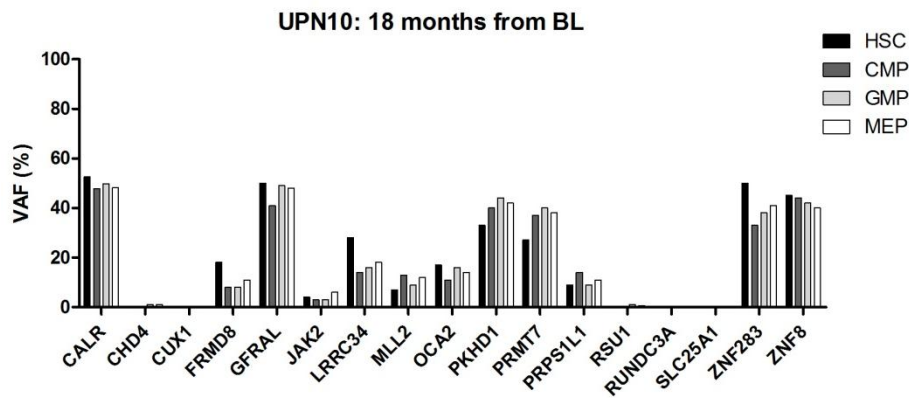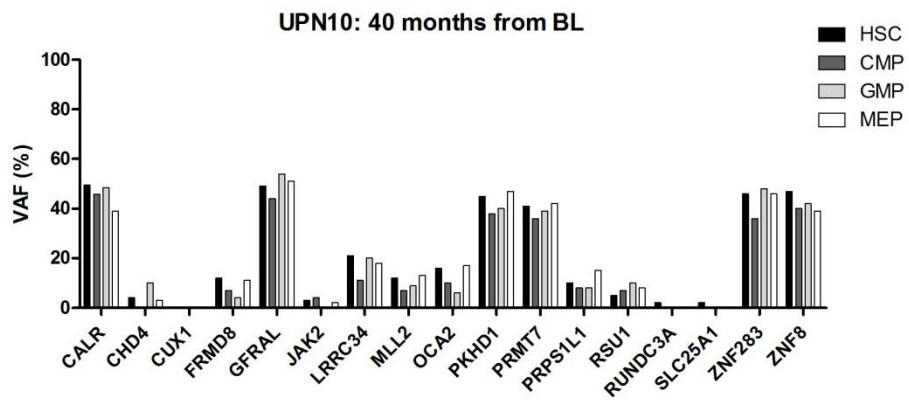

**Supplementary Figure 9. Comparison of variant allele frequencies (VAFs) in myeloid progenitor fractions of UPN06 and 10.** Hematopoietic stem cells (HSCs), common myeloid progenitors (CMPs), granulocyte-macrophage progenitors (GMPs) and megakaryocyte-erythroid progenitors (MEPs) were sorted from bone marrow samples. The VAFs in all different progenitor fractions are compared. VAFs are not corrected for local ploidy. BL indicates baseline

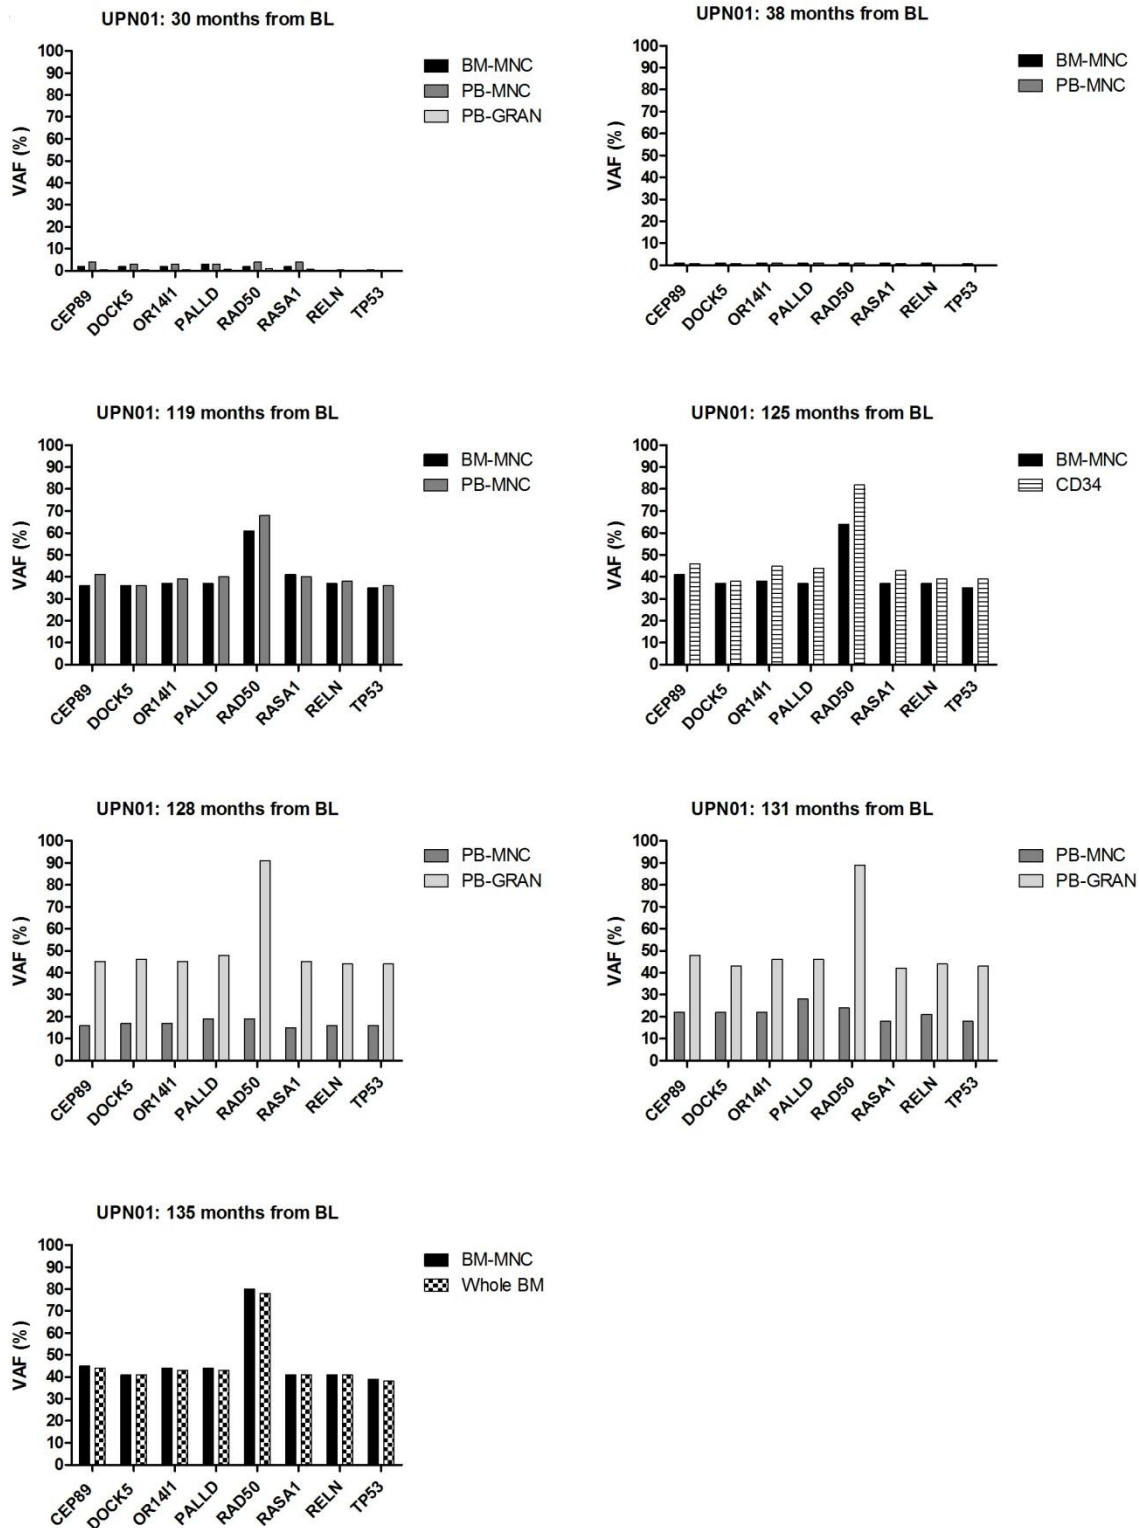

**Supplementary Figure 10. Comparison of variant allele frequencies (VAFs) in different peripheral blood (PB) and bone marrow (BM) fractions of UPN01.** For some time points, multiple PB or BM fractions were analyzed. The comparison of different fractions per time point is depicted. VAFs are not corrected for local ploidy. BL indicates baseline.

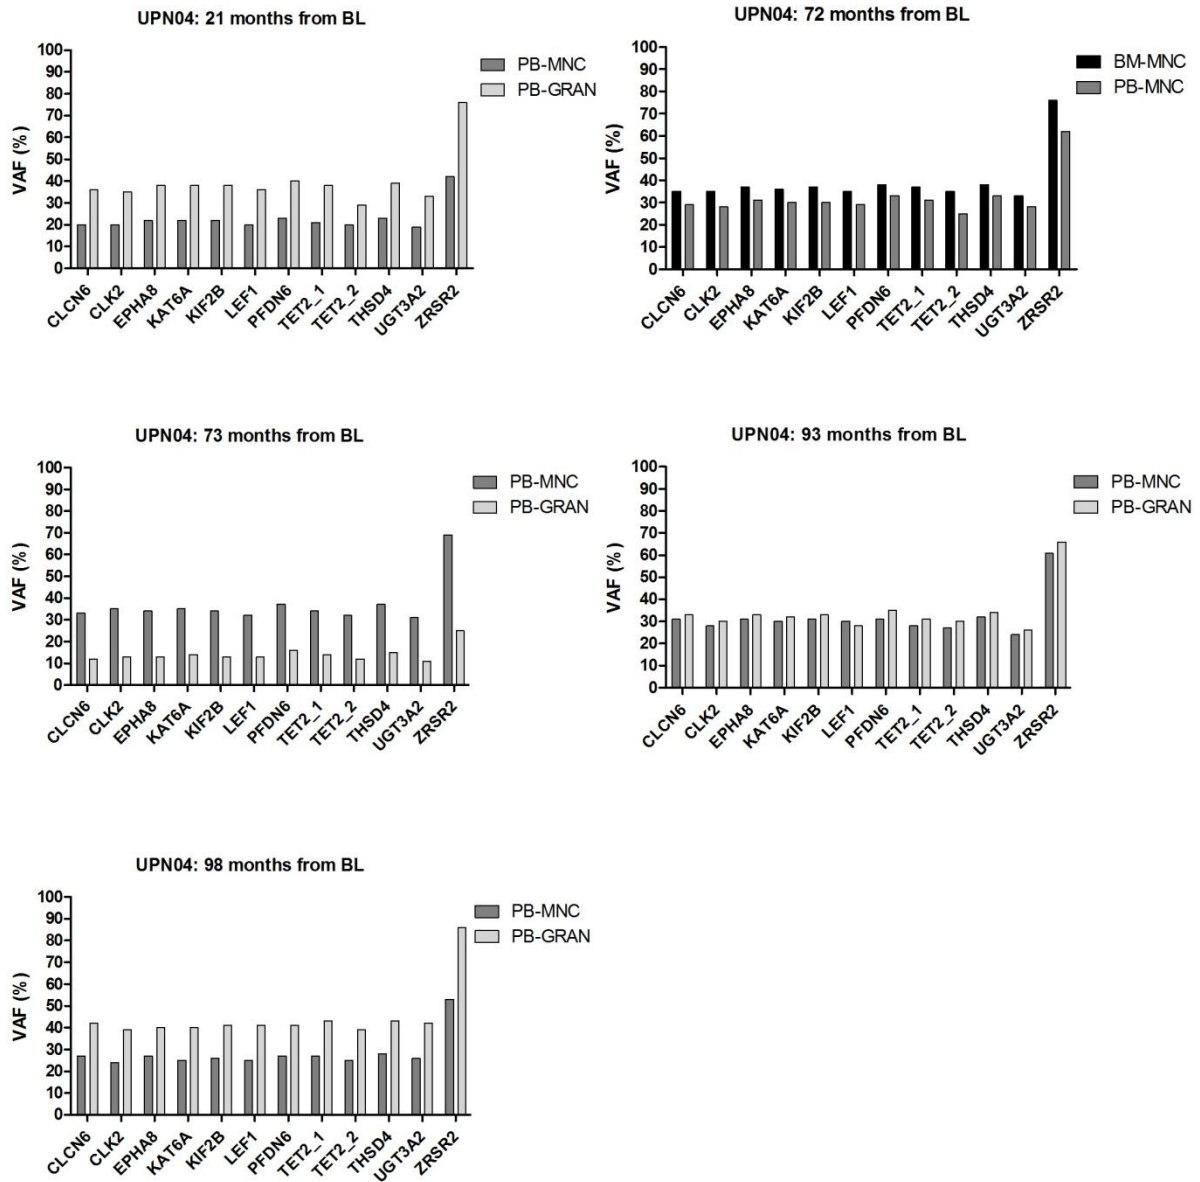

**Supplementary Figure 11. Comparison of variant allele frequencies (VAFs) in different peripheral blood (PB) and bone marrow (BM) fractions of UPN04.** For some time points, multiple PB or BM fractions were analyzed. The comparison of different fractions per time point is depicted. VAFs are not corrected for local ploidy. BL indicates baseline.



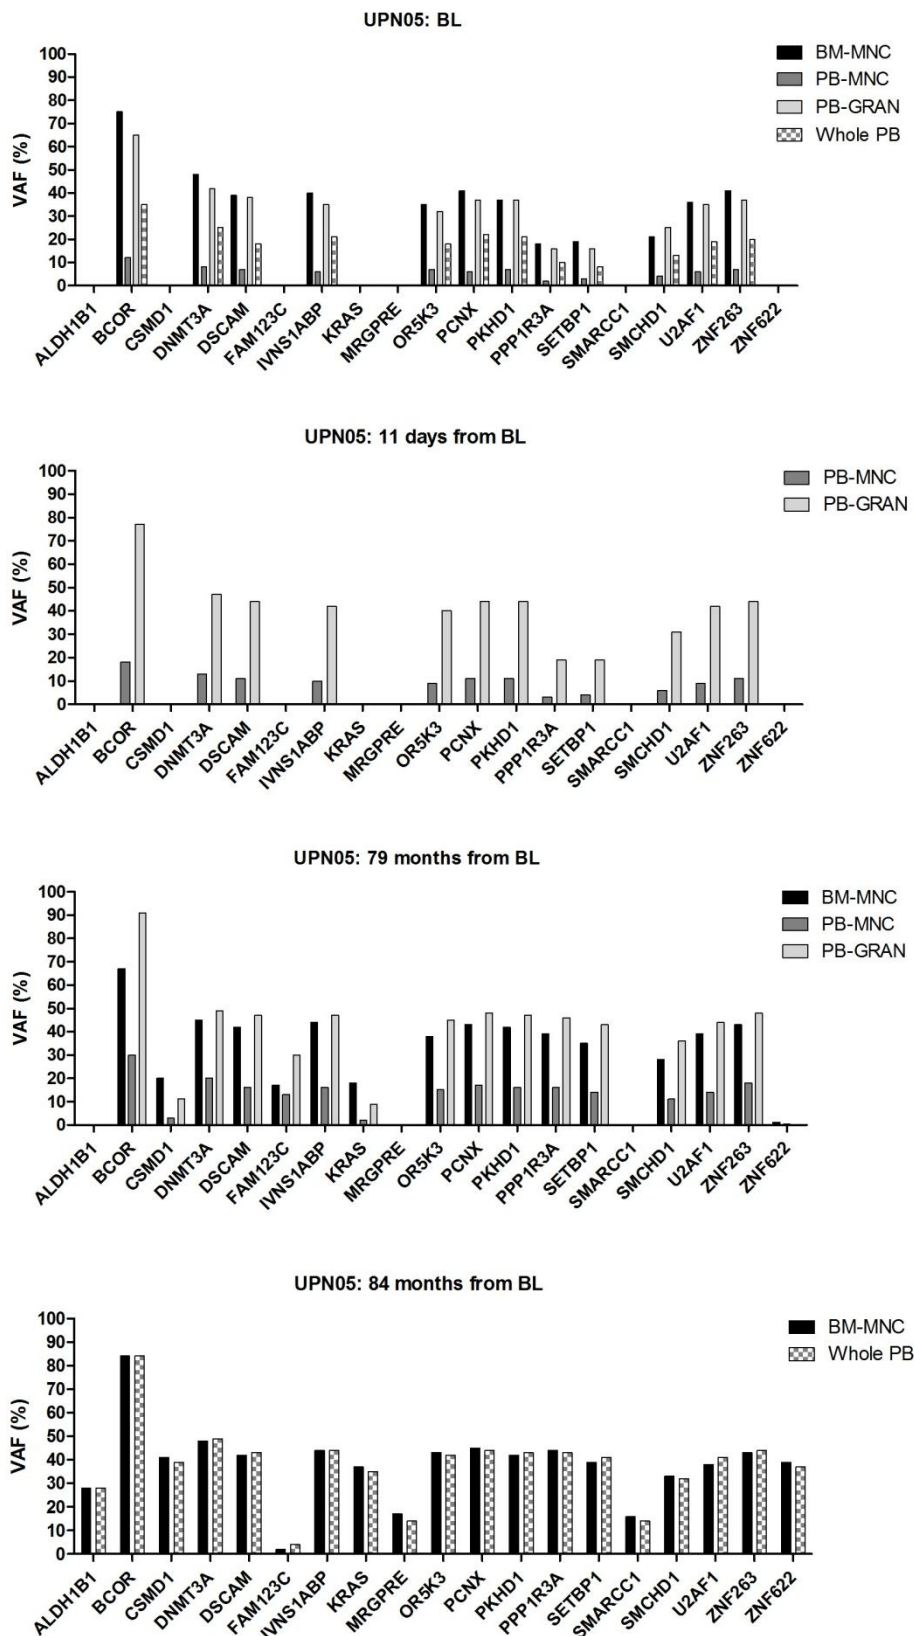

**Supplementary Figure 12. Comparison of variant allele frequencies (VAFs) in different peripheral blood (PB) and bone marrow (BM) fractions of UPN05.** For some time points, multiple PB or BM fractions were analyzed. The comparison of different fractions per time point is depicted. VAFs are not corrected for local ploidy. BL indicates baseline.

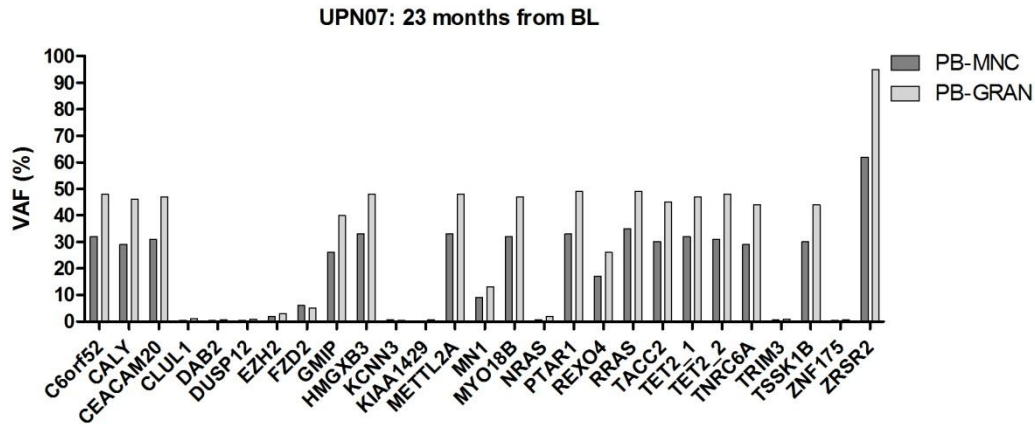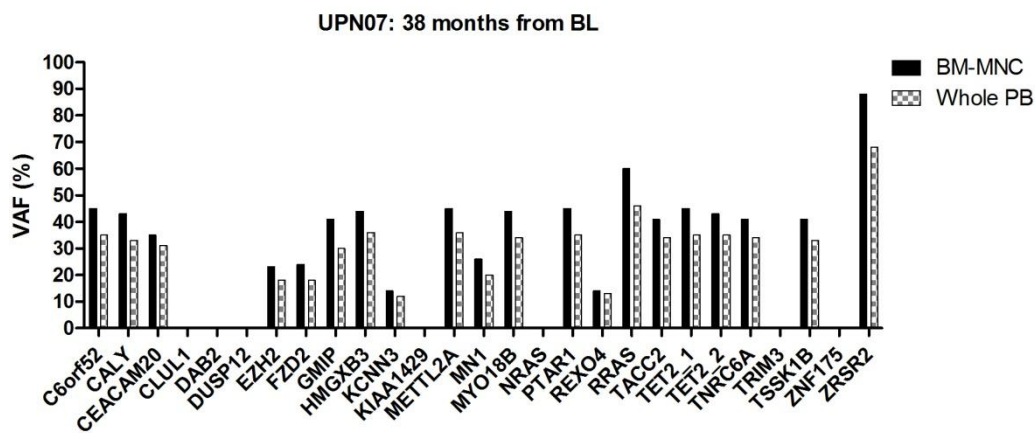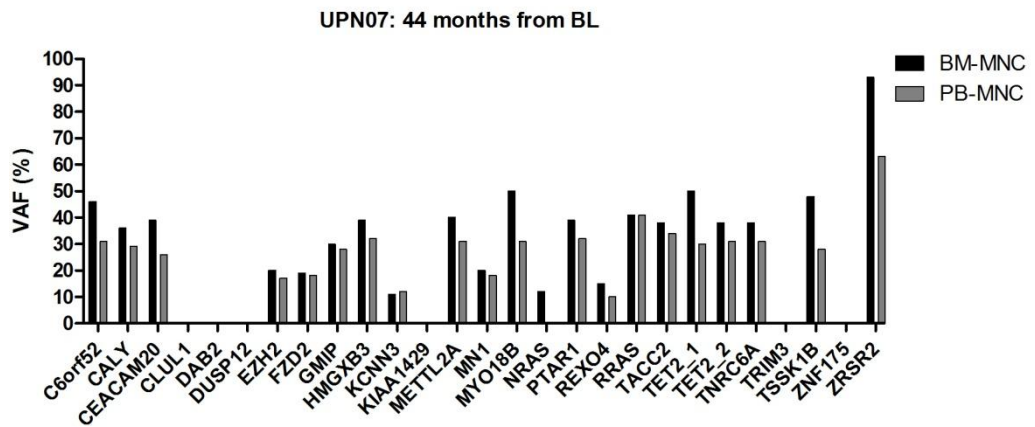

**Supplementary Figure 13. Comparison of variant allele frequencies (VAFs) in different peripheral blood (PB) and bone marrow (BM) fractions of UPN07.** For some time points, multiple PB or BM fractions were analyzed. The comparison of different fractions per time point is depicted. VAFs are not corrected for local ploidy. BL indicates baseline.

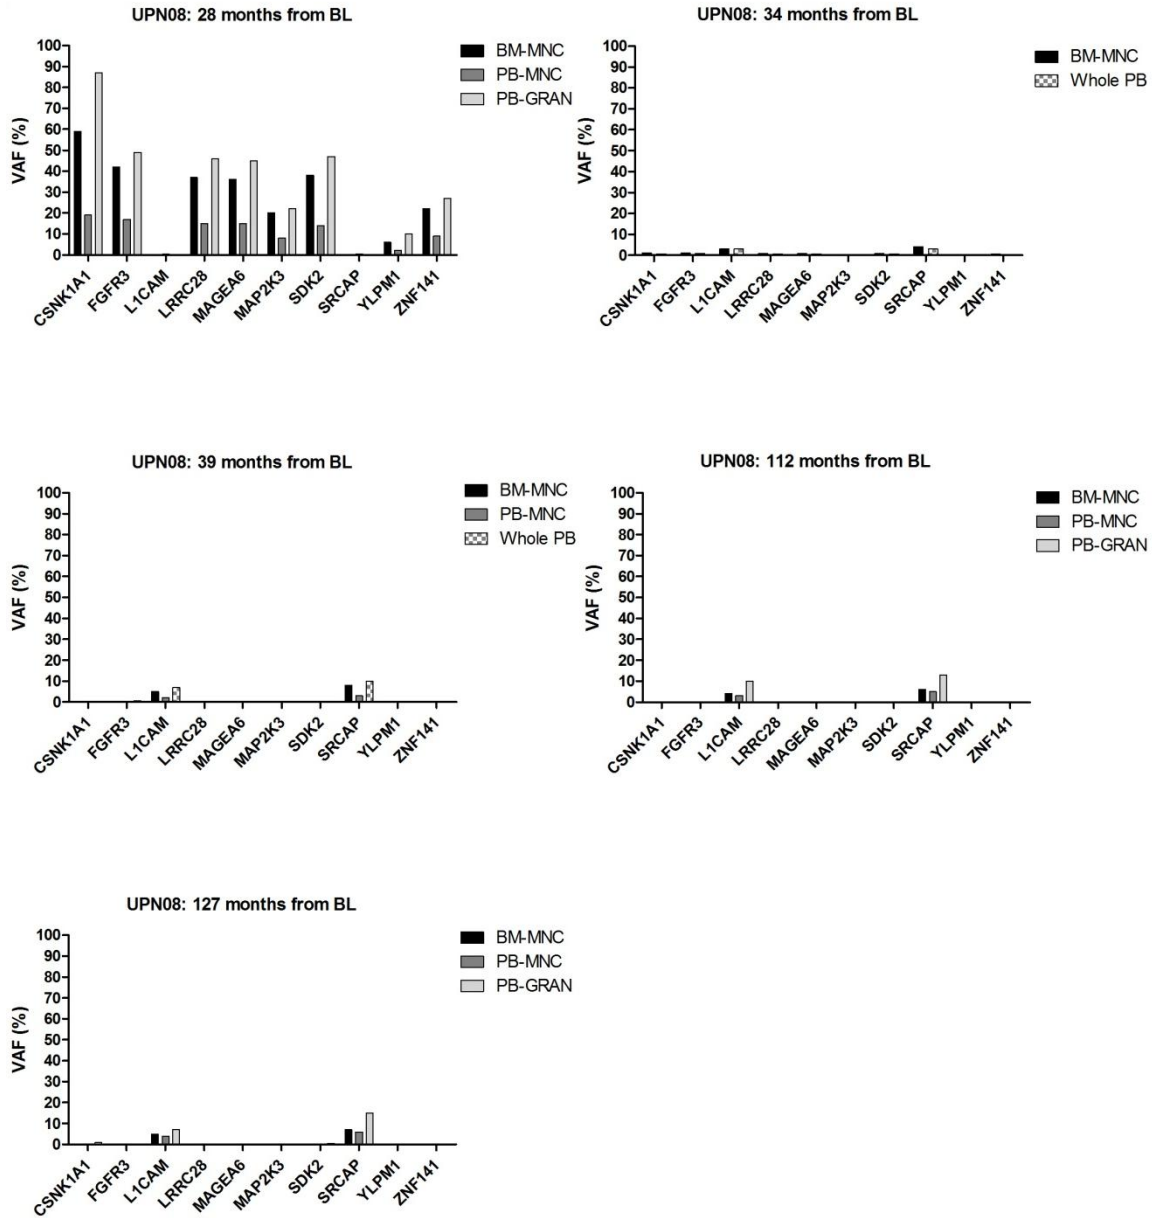

**Supplementary Figure 14. Comparison of variant allele frequencies (VAFs) in different peripheral blood (PB) and bone marrow (BM) fractions of UPN08.** For some time points, multiple PB or BM fractions were analyzed. The comparison of different fractions per time point is depicted. VAFs are not corrected for local ploidy. BL indicates baseline.

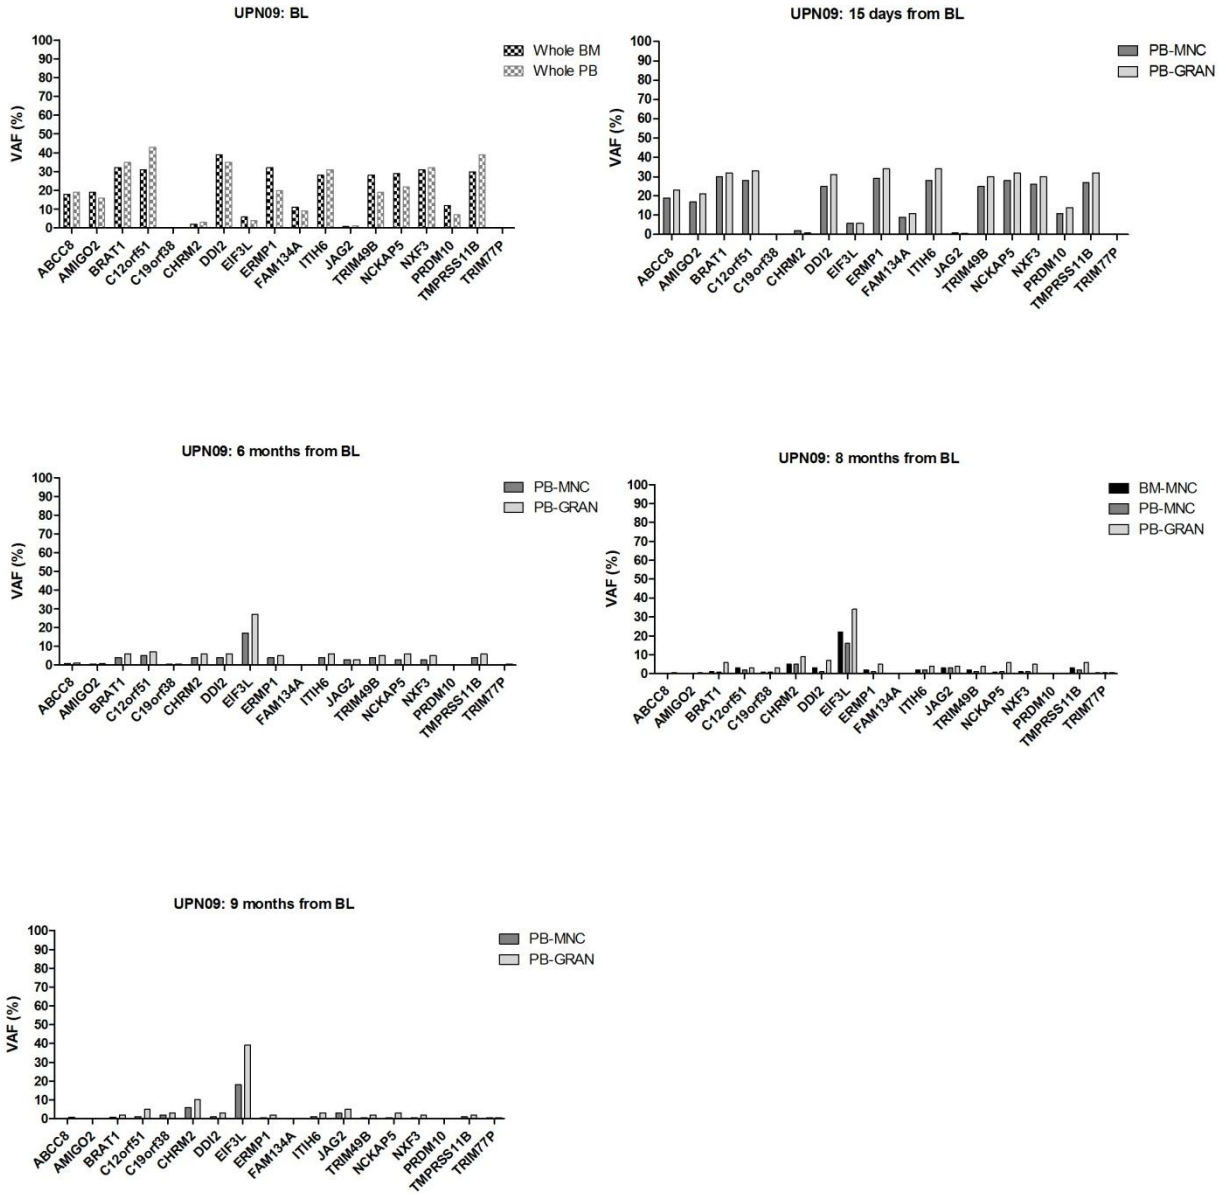

**Supplementary Figure 15. Comparison of variant allele frequencies (VAFs) in different peripheral blood (PB) and bone marrow (BM) fractions of UPN09.** For some time points, multiple PB or BM fractions were analyzed. The comparison of different fractions per time point is depicted. VAFs are not corrected for local ploidy. BL indicates baseline.

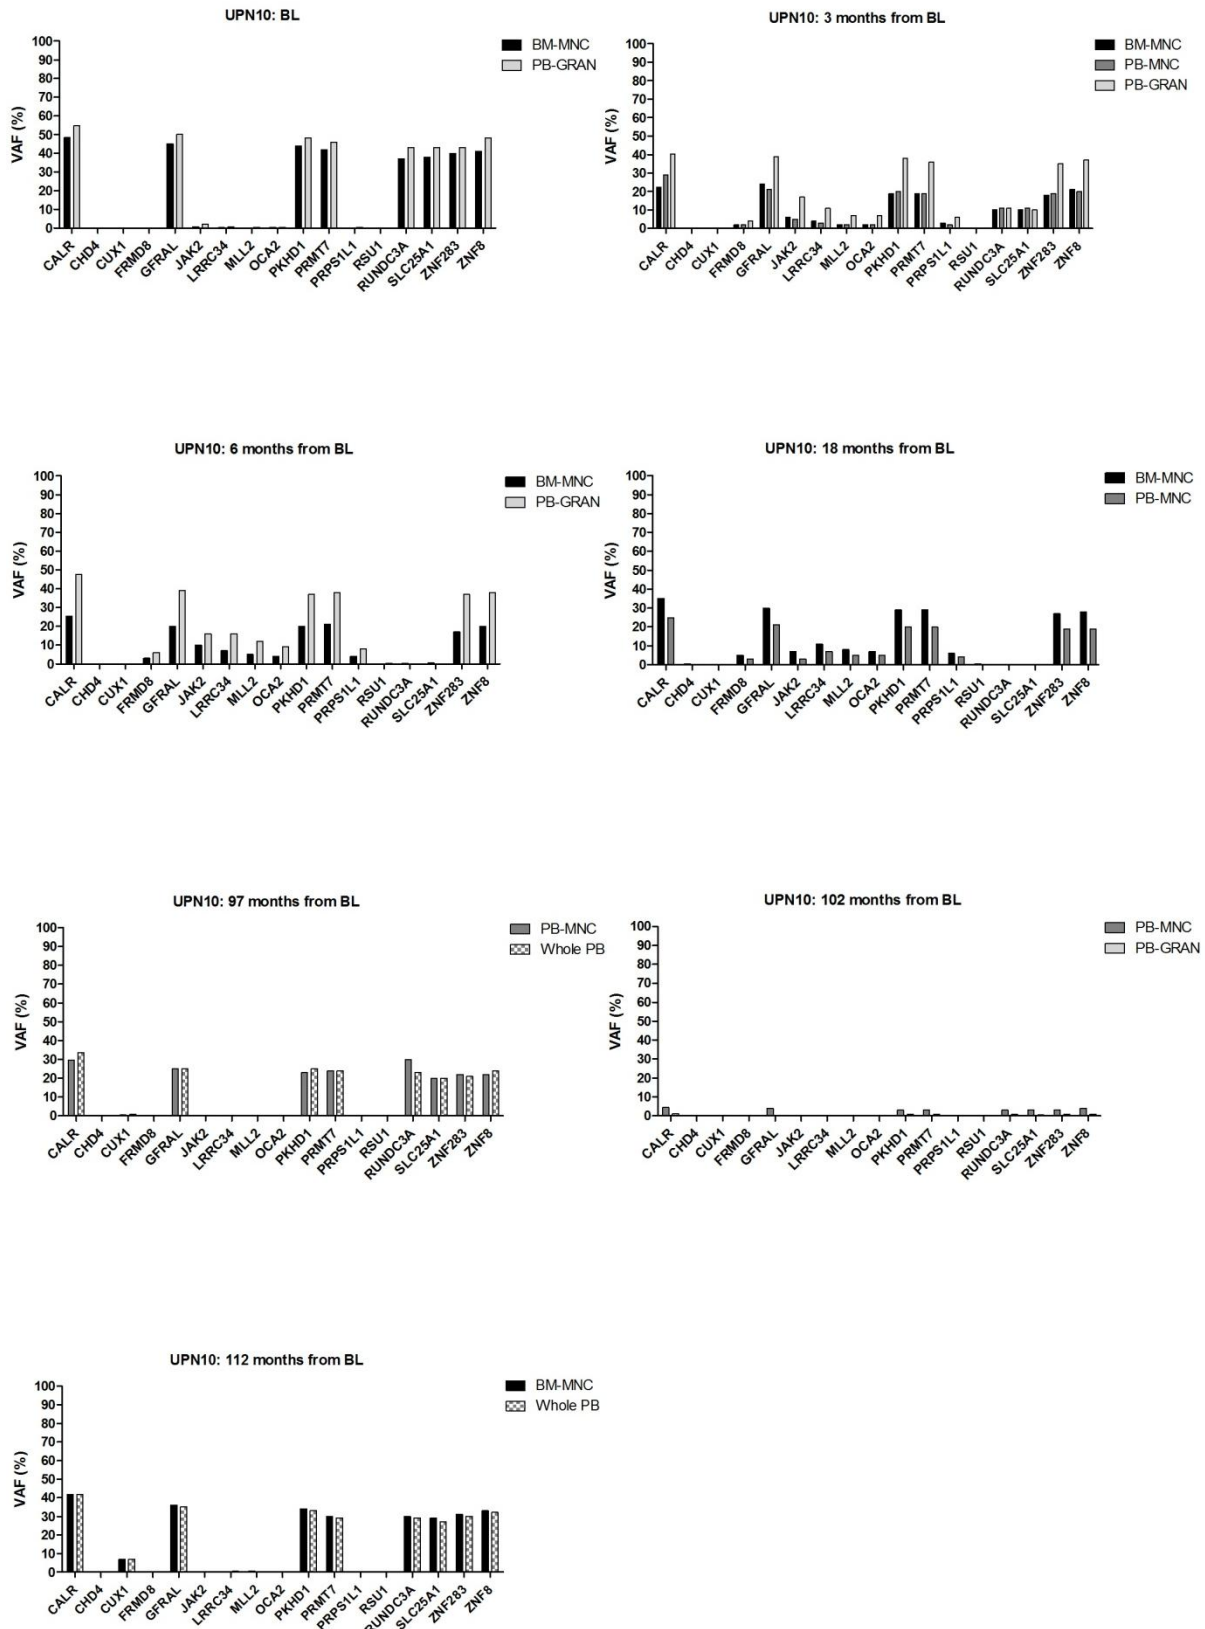

**Supplementary Figure 16. Comparison of variant allele frequencies (VAFs) in different peripheral blood (PB) and bone marrow (BM) fractions of UPN10.** For some time points, multiple PB or BM fractions were analyzed. The comparison of different fractions per time point is depicted. VAFs are not corrected for local ploidy. BL indicates baseline.

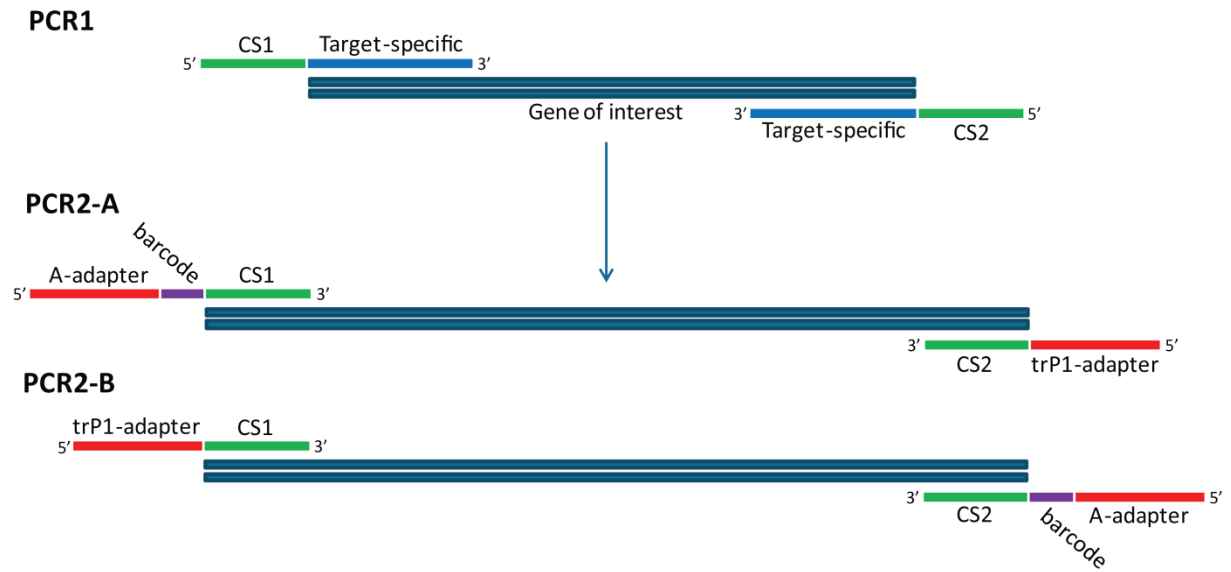

**Supplementary Figure 17. Primer strategy targeted deep sequencing.** In PCR1 target fragments are amplified and tagged with common sequence (CS) tags. In PCR2, primers containing a CS-tag, a barcode and an adapter are used to label the PCR fragments with a sample-specific Ion Xpress barcode. The second PCR is performed twice, once with the A adapter attached to the forward primer and the truncated P1 (trP1) adapter to the reverse primer (PCR2-A) and vice versa (PCR2-B), making bidirectional sequencing possible.
